# Supplementary material
Source: publisher site journal article supplement (https://www.spandidos-publications.com/1116/downloadSupplementary)

Figure S1. Immunohistochemistry staining of BUB1 in paired normal and liver tumor tissues from three different patients. Magnification, x400. BUB1, budding uninhibited by benzimidazole 1.

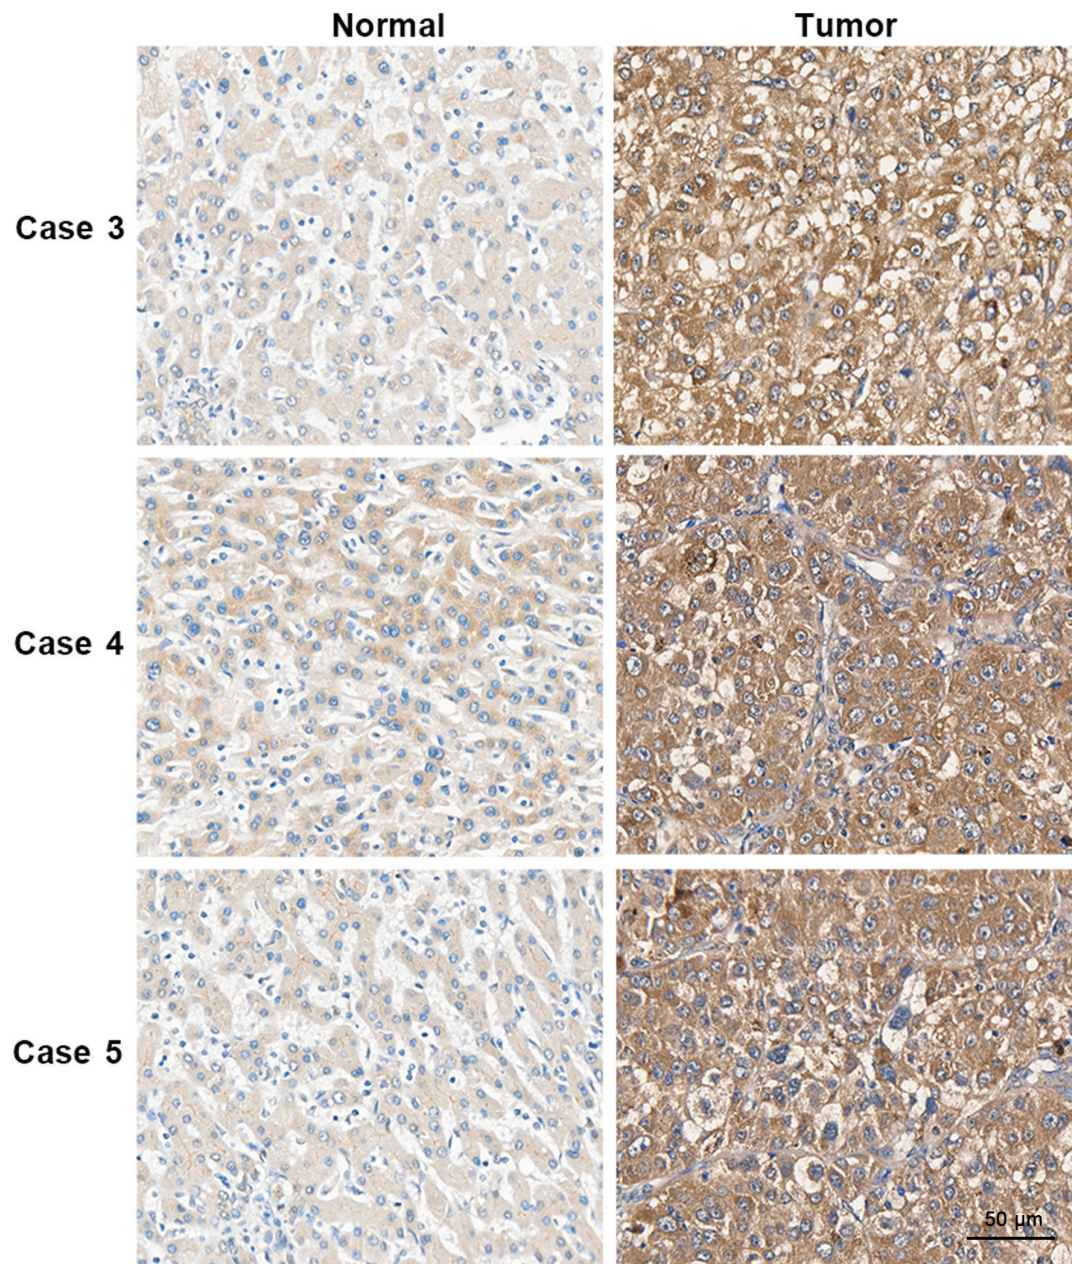

Figure S2. Further knockdown of BUB1 decreases the expression levels of p-SMAD2, Ki67, and PCNA in MHCC97-L and YY-8103 cells overexpressing BUB1, budding uninhibited by benzimidazole 1; p-, phosphorylated; sh, short hairpin.

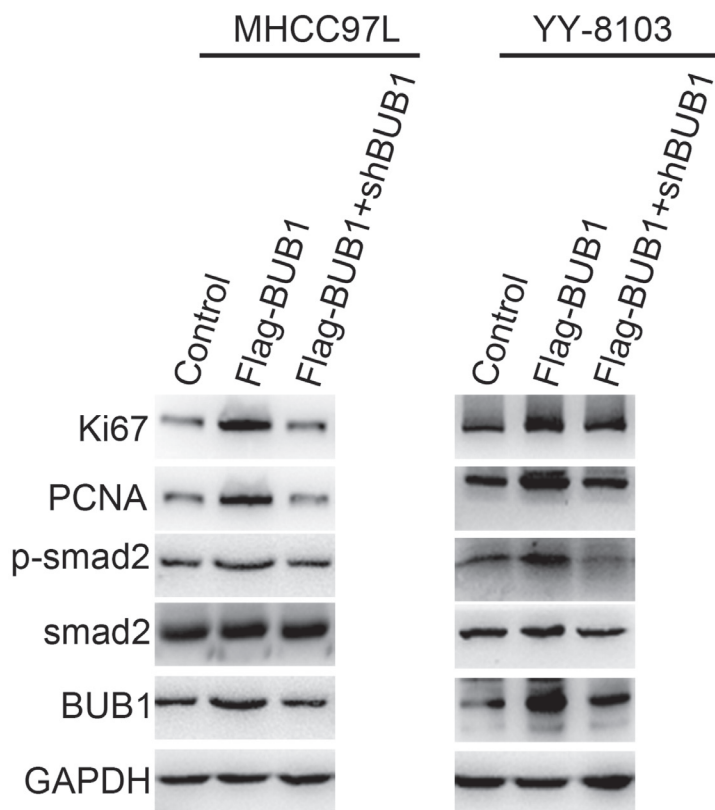

Supplement: Supplementary file [file downloadSupplementary]
